# Supplementary material for: The transcription factor NF-Y participates to stem cell fate decision and regeneration in adult skeletal muscle
Source: PubMed Central journal article supplement (PMC8516959; doi:10.1038/s41467-021-26293-w), 2021-10-14
Supplement: 41467_2021_26293_MOESM1_ESM.pdf [file 41467_2021_26293_MOESM1_ESM.pdf]

**The transcription factor NF-Y participates to stem cell fate decision and regeneration in adult skeletal muscle**

**Supplementary Information**

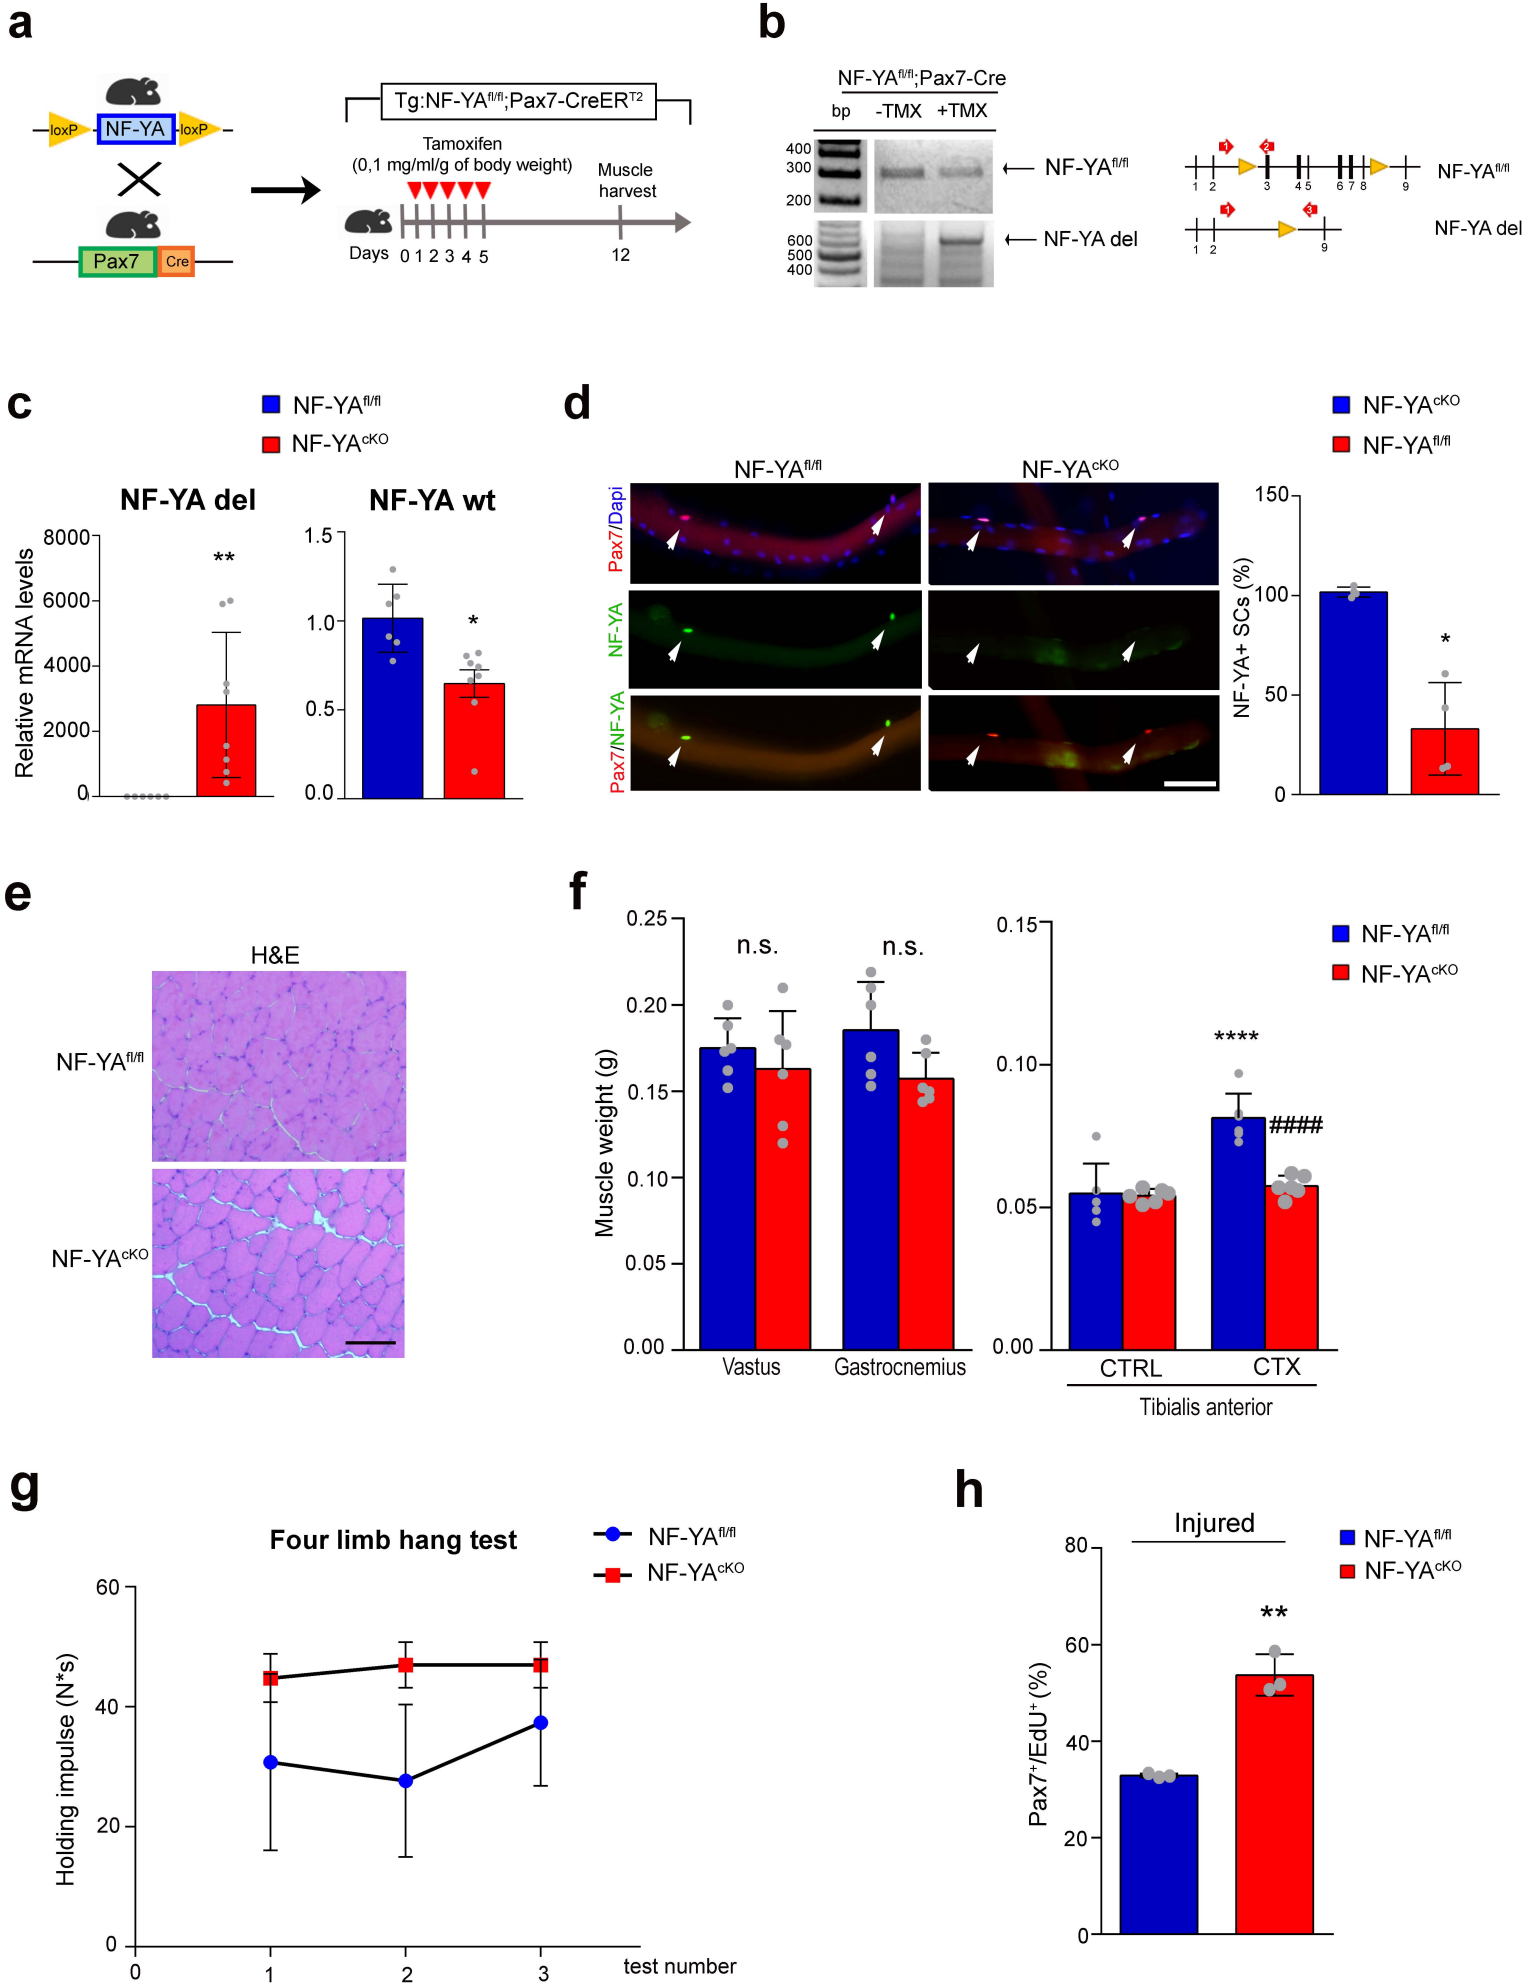

**Supplementary Fig.1: Characterization of NF-YA<sup>ckO</sup> mouse model.** (a) Schematic representation of mice crossed to obtain NF-YA<sup>fl/fl</sup>;Pax7-CreER<sup>T2</sup> F1 generation and Tamoxifen administration to induce NF-YA deletion in NF-YA<sup>ckO</sup> mice. (b) Left panel: PCR analysis of genomic DNA from NF-YA<sup>fl/fl</sup>;Pax7Cre Tamoxifen-treated and untreated mice. The arrows indicate NF-YA<sup>fl/fl</sup> amplicon, generated by primers 1 and 2, and NF-YA deleted (del) amplicon, generated by primers 1 and 3. PCR analysis was tested for each animal used for subsequent analyses. Right panel: Schematic representation of NF-YA coding gene, loxP elements (yellow triangles) and primers used for PCR analysis (red arrows). (c) qRT-PCR analysis of NF-YA deleted (del) (p=0.0100) and wt (p=0.0066) transcripts in SCs isolated from NF-YA<sup>ckO</sup> versus NF-YA<sup>fl/fl</sup> mice, arbitrarily set at 1. Data represent mean ± s.d. (two-tailed unpaired t-test: \*p<0.05, \*\*p< 0.01; n=3 mice). (d) Left panel: Representative immunofluorescence images of NF-YA and Pax7 in EDL myofibers at day 0 (d0) following isolation from NF-YA<sup>fl/fl</sup> and NF-YA<sup>ckO</sup> mice. Right panel: Quantification of NF-YA+ SCs identified by Pax7 positivity in NF-YA<sup>ckO</sup> versus NF-YA<sup>fl/fl</sup> myofibers, arbitrarily set at 100%. Data represent mean ± s.d. (two-tailed unpaired t-test: p=0.011; \*p<0.05; n=4 mice). (e) Representative images of NF-YA<sup>ckO</sup> and NF-YA<sup>fl/fl</sup> TA cross-sections stained with H&E. Scale bar: 50 μm. (f) Left panel: weight of vastus and gastrocnemius uninjured muscles of NF-YA<sup>ckO</sup> and NF-YA<sup>fl/fl</sup> mice. Right panel: weight of tibialis anterior muscle after 60 days from CTX injury of NF-YA<sup>ckO</sup> and NF-YA<sup>fl/fl</sup> mice. Data represent means ± s.d. (two-tailed unpaired t-test: \*p<0.05, \*\*p< 0.01; n=6 mice). (g) Four limb grip test performed on adult NF-YA<sup>ckO</sup> and NF-YA<sup>fl/fl</sup> mice 60 days after CTX injury. Three independent tests were performed. Data represent means ± s.d. (two-tailed unpaired t-test; n.s.= not significant. n=5 mice). (h) Percentage of EdU+/Pax7+ cells in TA muscle sections following 5 days from CTX-injury. Data represent mean ± s.d. (two-tailed unpaired t-test: \*\*p<0.01; n=3 mice).

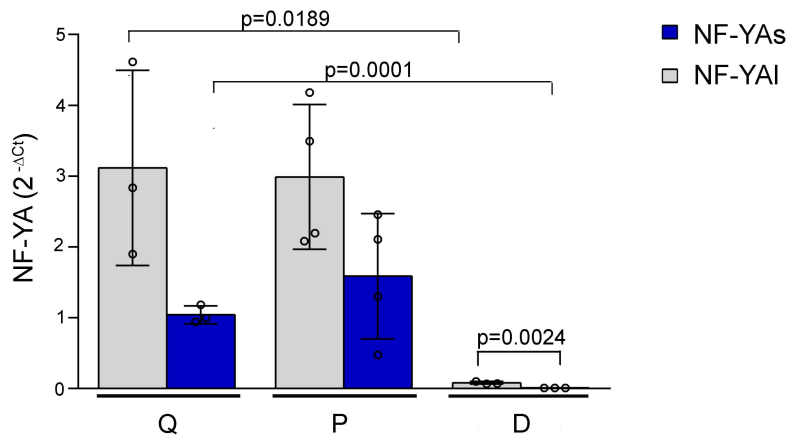

**Supplementary Fig. 2: Transcriptional analysis of enriched SC-cultures.** mRNA levels of NF-YA isoforms (NF-YAI and NF-YAs) in Pax3/GFP+ sorted SCs quiescent (Q), proliferating (P) and differentiating (D). Data represent mean  $\pm$  s.d. (two-tailed unpaired t-test: p values are shown in figure; n=3 mice).

**a**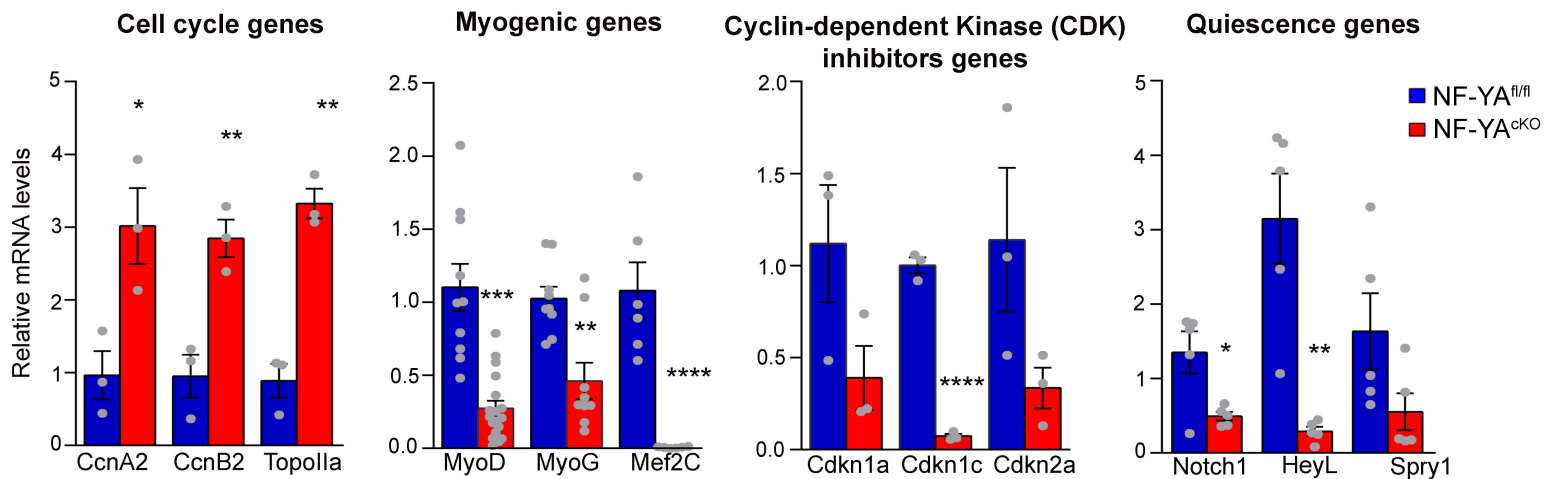**b**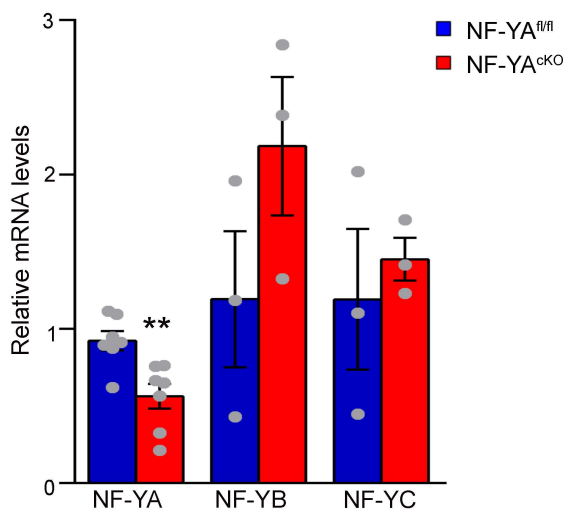**c**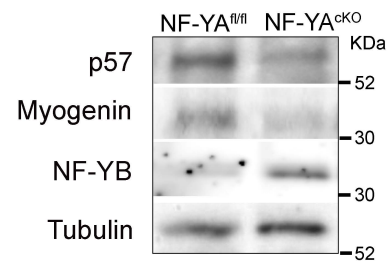**d**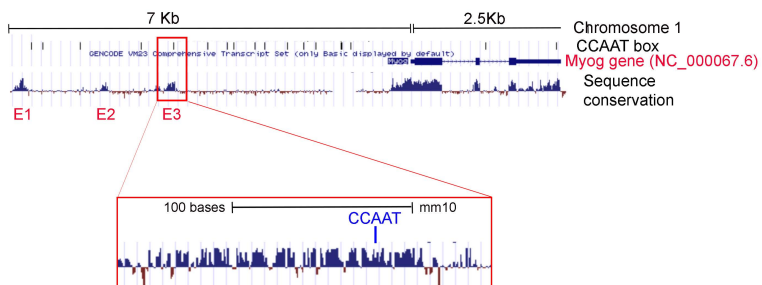**e**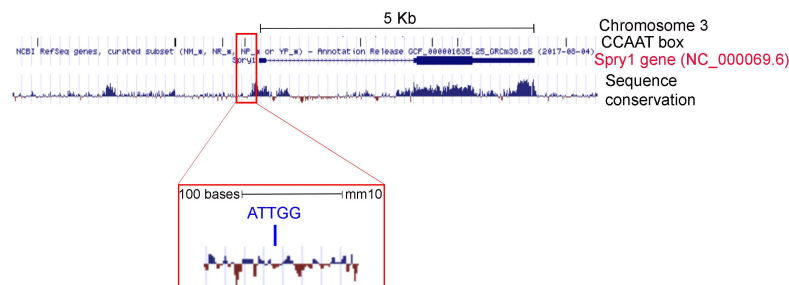

**Supplementary Fig. 3: Validation of transcriptional modulation of direct target genes in NF-YA<sup>CKO</sup> mouse.** (a) qRT-PCR analysis of the indicated genes in NF-YA<sup>fl/fl</sup> and NF-YA<sup>CKO</sup> SCs. Data represent mean  $\pm$  s.d. (two-tailed unpaired t-test: *CcnA2* p=0.0290, *CcnB2* p=0.0085, *Topolla* p=0.0014, *MyoD* p=0.0003, *MyoG* p=0.0016, *Mef2C* p<0.0001, *Cdkn1c* p<0.0001, *Notch* p=0.0179, *HeyL* p=0.0016; \*p<0.05, \*\*p<0.01, \*\*\*p<0.001, \*\*\*\*p<0.0001, n=5 mice). (b) Relative mRNA levels measured by qRT-PCR of NF-YA, NF-YB and NF-YC genes in NF-YA<sup>fl/fl</sup> and NF-YA<sup>CKO</sup> SCs. Data represent mean  $\pm$  s.d. (two-tailed unpaired t-test: *NF-YA* p=0.0041; \*\*p<0.05, n=5 mice). (c) Western blot of whole extracts from SCs isolated from NF-YA<sup>fl/fl</sup> and NF-YA<sup>CKO</sup> mice with anti-p57, anti-Myogenin and anti-NF-YB antibodies. Tubulin expression was used as loading control. n= 3 experiments. (d) Schematic representation (UCSC Genome browser) of *Myogenin* gene and upstream enhancer elements (E1, E2, E3). The enlargement shows the NF-Y binding element (CCAAT) within the E3 region. (e) Schematic representation (UCSC Genome browser) of *Sprouty1* gene and upstream promoter region. The enlargement shows the NF-Y binding element (CCAAT) at about 200 bp upstream of TSS.

## Supplementary Tables

**Supplementary Table 1:** Sequence of each primer used for mice genotyping.

| <b>Genomic qPCR</b>            | <b>FORWARD</b>                 | <b>REVERSE</b>              |
|--------------------------------|--------------------------------|-----------------------------|
| <i>NF-YA<sup>fl/fl</sup></i>   | GTAAGTCAGGCTCCAGGG             | AGGCAAGGCAGATTTAGGAAGGTC    |
| <i>NF-YA<sup>del</sup></i>     | GTAAGTCAGGCTCCAGGG             | GGTTGTCAGGATGTTCCGACG       |
| <i>Pax7-Cre<sup>ERT2</sup></i> | CCACACCTCCCCCTGAACCTGAAACATAAA | GAATCCCCGGGGAGTCGCATCCTGCGG |

**Supplementary Table 2:** Sequence of each primer used in real time qPCR for mRNA analysis.

| <b>RT-qPCR</b>       | <b>FORWARD</b>           | <b>REVERSE</b>           |
|----------------------|--------------------------|--------------------------|
| <i>Rps15</i>         | ACCTACAAACCCGTGAAGCA     | CCAGGGACCAAACCAGTC       |
| <i>NF-YA wt</i>      | ACGAAGGAAATACCTCCATGAGTC | CTTCCCCACGTTCCGT         |
| <i>NF-YA deleted</i> | CAGACCCTCCAGGTAGATCCAA   | TGTGGTTAGGAACTCGGATGA    |
| <i>Pax7</i>          | GCTACCAGTACAGCCAGTATG    | GTCACTAAGCATGGGTAGATG    |
| <i>eMyHC</i>         | TTGATGCCAAAACCTACTGCT    | GGGTCCTGCTGTCTTCTGTC     |
| <i>Myf5</i>          | CACCACCAACCCTAACCAGA     | GTTCTCCACCTGTTCCCTCA     |
| <i>Myogenin</i>      | GAGCCCCACTTCTATGATGG     | GTCCCCAGTCCCTTTTCTTC     |
| <i>Mef2c</i>         | AGTACACCGAGTACAACGAGC    | GCCTGTGTTACCTGCACTTGG    |
| <i>Ccnb2</i>         | TCTCTGATGCTCTGCTCTGC     | CCGAAACTTGGAATGGACTT     |
| <i>Ccna2</i>         | CAGAACTCATTGGCTCTCA      | GCCAAGGGAAAAGGAAGAAG     |
| <i>Topo-IIa</i>      | ACGGAATGACAAGCGAGAAG     | AAACAACAACCGAGCCAAAG     |
| <i>Cdkn1a</i>        | CAAGGAGACCCCAAAGTCC      | GAGGCAGATTTCTATCACTCC    |
| <i>Cdkn1c</i>        | TCCACCTCCATCCACTGC       | AGAACCGCTGGGACTTAAC      |
| <i>Cdkn2a</i>        | CGCTTTTGTTCGGTTTTGTT     | TCCAGGGGCTTATGATTCTG     |
| <i>NF-YA</i>         | ACAGTATCACCGCATCCTTAAGA  | CCTTCGTTCCCTTTGGGATTT    |
| <i>NF-YB</i>         | AAGCGGAAGACAATCAATGG     | ATCTGTGGCGGAGACTGCT      |
| <i>NF-YC</i>         | GCTACCAATGCCAACAGAT      | CCCTCAGTCTCCAGTCACCT     |
| <i>Mre11a</i>        | CTTATCCGACTACGGGTGGA     | TTTCCCTTTTGTCCCTGTG      |
| <i>Brca1</i>         | GAAACACGCCAAATGTCTGA     | GATACGCTGGTGCTCTCCTC     |
| <i>Rad51</i>         | GGTTAGAGCAGTGTGGCATAA    | TAGTTCCTTCTTCGGTGCATAAG  |
| <i>Notch1</i>        | GCAACTGTCTCTGCCATATAC    | GTCTTCAGACTCCTTGCATACC   |
| <i>HeyL</i>          | CATCACTCCCTGAAGACGAAAG   | GGAAGGGTTGTAGCCTTAGATG   |
| <i>Spry1</i>         | CACACTTCGCTAGTGGTGATT    | TGGTCTAGGGACAGAATCGTAG   |
| <i>Birc5</i>         | CCGAGAACGAGCCTGATTT      | GAGTGCTTTCTATGCTCCTCTATC |
| <i>Bcl2l2</i>        | GTGGGTAGAAGCTTTGGTAGTT   | GCTGGATAGAGAGACCCTAGAA   |



**Supplementary Table 3:** Sequence of each primer used in real time qPCR for ChIP analysis.

| <b><i>RT-qPCR</i></b>    | <b><i>FORWARD</i></b>  | <b><i>REVERSE</i></b> |
|--------------------------|------------------------|-----------------------|
| <i>Chrm7</i>             | ATAAAGGCTTGGCACTCGTC   | CAGTTCCTTTGCTTGATCC   |
| <i>Ccnb1</i>             | CAGGCATAGAGCCTGACCTC   | GTCTGCCGGGCTTAGGTTTA  |
| <i>Ccnb2</i>             | AAATACAAGCCAGCCAATCAA  | GACGAGGCACAGCCACTC    |
| <i>Topo-IIa</i>          | CCTTCCTCATTGGTCAGATTTT | GACTCGCTCTCATTGGCTCT  |
| <i>Cdkn1c promoter</i>   | CCAAGCTGGACAGGACAAG    | AAGCGTTCCATCGCTGTT    |
| <i>Cdkn1c 5'UTR</i>      | GATCTGACCTCAGACCCAATTC | TGCTCAGAGACCTGCTCA    |
| <i>Myogenin enhancer</i> | CAGGTCAGAGCTGATGGAT    | CACTAGCTGCCCTCTGATG   |
| <i>Spry1</i>             | AAACTCAACTCTAAGGGTGGCT | GAGGAGCGGGCATTCCA     |
